# Supplementary material for: Quantifying the hepatotoxic risk of alcohol consumption in patients with rheumatoid arthritis taking methotrexate
Source: PubMed Central journal article supplement (PMC5561375; doi:10.1136/annrheumdis-2016-210629), 2017-03-23
Supplement: annrheumdis-2016-210629supp001.pdf [file annrheumdis-2016-210629supp001.pdf]

**Supplementary table S1:** Characteristics of patients excluded from the study

| Reason for exclusion from the study (exclusion occurred sequentially from left to right) |                             |                            |                                                                                                            |                                                         |                                                                        |                                                                            |                                            |
|------------------------------------------------------------------------------------------|-----------------------------|----------------------------|------------------------------------------------------------------------------------------------------------|---------------------------------------------------------|------------------------------------------------------------------------|----------------------------------------------------------------------------|--------------------------------------------|
|                                                                                          | Total RA cohort<br>n=44 586 | Not taking MTX<br>n=20 106 | Prescription occurred prior to practice coming up to standard, or before patient joined practice<br>n=2384 | Fewer than 6 serum LFT measurements per year<br>n=10257 | No information available on weekly units of alcohol consumed<br>n=2898 | No information on alcohol consumption (status or units) available<br>n=804 | Patients included in final model<br>n=9907 |
| <b>Age mean (sd)</b>                                                                     |                             | 55 (16.7)                  | 53 (14.6)                                                                                                  | 58 (14.9)                                               | 61 (14.2)                                                              | 58 (17.2)                                                                  | 61 (13.9)                                  |
| <b>Female n (%)</b>                                                                      |                             | 14 138 (70)                | 1740 (73)                                                                                                  | 7161 (70)                                               | 2314 (80)                                                              | 578 (72)                                                                   | 8401 (71)                                  |
| <b>No alcohol consumed n (%)</b>                                                         |                             | 3975 (20)                  | 518 (22)                                                                                                   | 2888 (31)                                               | 1770* (61)                                                             | n/a                                                                        | 3259 (28)                                  |
| <b>Alcohol (units per week) mean (sd)</b>                                                |                             | 6.9 (11)                   | 4.8 (8)                                                                                                    | 6.6 (10)                                                | n/a                                                                    | n/a                                                                        | 6.2(9.6)                                   |

\*These 1770 patients were subsequently recoded as consuming zero alcohol units per week and thus are included in the cohort of 9907 patients in the column to the right

**Table S2:** Associations between weekly alcohol consumption and occurrence of transaminitis (defined using secondary definition).

| <b>Units of alcohol per week</b> | <b>Number of events*<sup>§</sup></b> | <b>Person years (1000)</b> | <b>Crude rate (95% CI)</b><br><i>Per 1000 person years</i> | <b>Hazard ratio (95% CI)</b><br><i>Univariate</i> | <b>Hazard ratio (95% CI)</b><br><i>Age &amp; gender adjusted</i> |
|----------------------------------|--------------------------------------|----------------------------|------------------------------------------------------------|---------------------------------------------------|------------------------------------------------------------------|
| 0                                | 226                                  | 12.56                      | 18.00                                                      | ref                                               | ref                                                              |
| 1-7                              | 329                                  | 18.15                      | 18.12                                                      | 1.02 (0.86-1.21)                                  | 0.98 (0.83-1.16)                                                 |
| 8-14                             | 97                                   | 5.12                       | 18.95                                                      | 1.05 (0.83-1.33)                                  | 0.95 (0.75-1.21)                                                 |
| 15-21                            | 41                                   | 1.65                       | 24.82                                                      | 1.37 (0.98-1.91)                                  | 1.18 (0.84-1.65)                                                 |
| >21                              | 36                                   | 1.32                       | 27.34                                                      | 1.48 <sup>†</sup> (1.04-2.10)                     | 1.26 (0.87-1.81)                                                 |
| Total                            | 866                                  | 45.49                      | 19.04 (17.81-20.35)                                        | 1.05 (0.90-1.22)                                  | 0.98 (0.84-1.15)                                                 |

\*Event=transaminitis, defined as three consecutive ALT or AST measures greater than ULN

<sup>§</sup>Not all patients who were defined as drinkers/non-drinkers had alcohol consumption defined in units

<sup>†</sup> p<0.05
